# Supplementary material for: Cerebral palsy in children in Kampala, Uganda: clinical subtypes, motor function and co-morbidities
Source: PubMed Central journal article supplement (PMC4421914; doi:10.1186/s13104-015-1125-9), 2015-04-23
Supplement: 13104_2015_1125_MOESM3_ESM.pdf [file 13104_2015_1125_MOESM3_ESM.pdf]

**PREGNANCY HISTORY (For birth of this child):**

Gravidity \_\_\_ CHQ41 Stillbirths \_\_\_ CHQ42

Parity \_\_\_ CHQ43 Spontaneous abortions \_\_\_ CHQ44

Enter the correct numbers for gravidity, parity.

Gravidity = total number of pregnancies before this child (and counting this child).

Parity = total number of actual births before this child (and counting this child)

Note any stillbirths and spontaneous abortions that applied at the time of this child's birth.

When the mother was pregnant with this child did she have:

Codes: No=1 Yes=2 Don't know=8

Antenatal care \_\_\_ CHQ45

High Blood Pressure \_\_\_ CHQ46

Bleeding in 1<sup>st</sup> trimester \_\_\_ CHQ47

Bleeding in 2<sup>nd</sup> or 3<sup>rd</sup> trimester \_\_\_ CHQ48

Diabetes \_\_\_ CHQ49

Infection/Fever in 1<sup>st</sup> trimester \_\_\_ CHQ50

Injuries resulting from violence \_\_\_ CHQ51

Poor nutrition \_\_\_ CHQ52

Treatment with Thyroid hormone \_\_\_ CHQ53

Treatment with Oestrogen/progesterone hormone \_\_\_ CHQ54

Treatment with anticonvulsants \_\_\_ CHQ55

Treatment for a psychiatric disorder \_\_\_ CHQ56

\*Any other health problems? \_\_\_ CHQ57

(If Yes, Specify \_\_\_\_\_)

\*(Prompt for signs of UTI .Do not include here problems with veins, moderate vomiting or mild conditions)

Has the mother *ever* had a goiter? \_\_\_ CHQ58 Has the mother *ever* had epilepsy? \_\_\_ CHQ59

Age of Father at child's birth \_\_\_ CHQ60 Age of the mother at delivery of child (years) \_\_\_ CHQ61

**BIRTH HISTORY:**

Where was the child born? \_\_\_ CHQ62

Codes: Home=1, Hospital=2, Clinic/Maternity Home=3, Other=4, Unknown=8

Was it a single birth? \_\_\_ CHQ63

Codes: Single birth=1, Twins=2, Triplets or more=3, Unknown=8

Was the baby born at term (between 37-42 weeks or at about 9 months)? \_\_\_ CHQ64

Codes: Yes=1 No, >3 weeks early=2 No, > 2 weeks late=3, Unknown=8

Was there prolonged rupture of membranes (>24 hours) before delivery? \_\_\_ CHQ65

Codes: No=1, Yes=2, Don't know=8

How long was the labour? \_\_\_ CHQ66

Codes: <24 hours=1, >24 hours=2, No labor, C-Section= 3, Unknown=8

Who assisted in delivering the baby? \_\_\_ CHQ67

Codes: Trained midwife=1, TBA=2, Doctor=3, Family member=4 Other=5 Don't know=8

Was there cord prolapse during labour and/or delivery? \_\_\_ CHQ68

Codes: No=1, Yes=2, Don't know=8

Was there placenta previa during labour and/or delivery? \_\_\_ CHQ69

Codes: No=1, Yes=2, Don't know=8

Was there uterine rupture during labour and/or delivery? \_\_\_ CHQ70

Codes: No=1, Yes=2, Don't know=8

*Cerebral Palsy Study (CPSTUD) ID: I|G|D|0|9|\_\_\_|\_\_\_|\_\_\_|\_\_\_|\_\_\_|*

Were there any other difficulties with labour and/or delivery? \_\_\_ CHQ71

Codes: No=1 Yes=2 (Specify \_\_\_\_\_) Don't know=8

In what position was the baby born? \_\_\_ CHQ72

Codes: Head first=1, Feet or buttocks first=2, C-Section=3, Unknown=8

Did the baby cry immediately after birth? \_\_\_ CHQ73

Codes: Yes=1 No, but in <5 min.=2, No, after>5 minutes=3, Unknown=8

What was the colour of the baby at birth? \_\_\_ CHQ74

Codes: Normal=1 Blue=2 White=3 Unknown=8

Did the birth attendant have to do anything to the baby to make her/him breathe? \_\_\_ CHQ75

Codes: No=1 Yes=2 Unknown=8

If yes, describe **why** and **how** breathing was assisted:

---

---

---

Was the baby taken away from the mother immediately after birth? \_\_\_ CHQ76

Codes: No=1 Yes=2 Unknown=8

If yes, describe circumstances: \_\_\_\_\_

---

---

If the baby was kept in a hospital, for how many days was kept there? \_\_\_ \_\_\_ CHQ77

(Enter 00 if child was not admitted to hospital)

What was the birth weight in kilograms? (9.9=Unknown): \_\_\_ . \_\_\_ CHQ78

How big was the baby at birth? \_\_\_ CHQ79

Codes: About the size of most babies=1, Bigger than most babies=3

Smaller than most babies =2, Don't know=8

Did the child have any difficulties from 28<sup>th</sup> weeks gestation to the first seven days after birth?

**(Perinatal period)**

Codes: No=1, Yes=2, Don't know=8

Seizures \_\_\_ CHQ80

Infection (fever) \_\_\_ CHQ81

Trouble feeding \_\_\_ CHQ82

Tetanus \_\_\_ CHQ83

Deep jaundice \_\_\_ CHQ84

Diarrhoea \_\_\_ CHQ85

Difficult breathing \_\_\_ CHQ86

Did the child have any difficulties from birth to day 28 after birth?

**(Neonatal period)**

Codes: No=1, Yes=2, Don't know=8

Seizures \_\_\_ CHQ87

Infection (fever) \_\_\_ CHQ88

Trouble feeding \_\_\_ CHQ89

Tetanus \_\_\_ CHQ90

Deep jaundice \_\_\_ CHQ91

Diarrhoea \_\_\_ CHQ92

Difficult breathing \_\_\_ CHQ93

**Cerebral Palsy Study (CPSTUD) ID: I|G|D|0|9|\_\_\_|\_\_\_|\_\_\_|\_\_\_|\_\_\_|**

Did the child have any of these conditions from one month of age to the age of 2 years?

**(Post neonatal)**

Codes: No=1, Yes=2, Don't know=8

- Seizures \_\_\_\_\_ CHQ94
- Febrile convulsions \_\_\_\_\_ CHQ95
- Meningitis \_\_\_\_\_ CHQ96
- Tetanus \_\_\_\_\_ CHQ97
- Deep jaundice \_\_\_\_\_ CHQ98
- Cerebral Malaria \_\_\_\_\_ CHQ99
- Difficult breathing \_\_\_\_\_ CHQ100
- Trauma to head \_\_\_\_\_ CHQ101
- Hydrocephalus \_\_\_\_\_ CHQ102

**EPILEPSY HISTORY:**

Has child ever suffered from epilepsy or multiple seizures? \_\_\_\_\_ CHQ103

(i.e. Two or more unprovoked seizures excluding neonatal & febrile seizures) Codes: No=1, Yes=2, Don't know=8

If yes, verbal account \_\_\_\_\_  
\_\_\_\_\_  
\_\_\_\_\_

If yes, is child on medication for seizures? \_\_\_\_\_ CHQ104

Codes: No=1, Yes=2, Don't know=8, (Enter 0 if child has no seizures)

Which drugs is child on? \_\_\_\_\_ (List name(s)) CHQ105

\*\*\*\*(Enter 00 if child has no seizures)\*\*\*\*\*

**FAMILY HISTORY:**

Are the parents of the child related to each other by blood? \_\_\_\_\_ CHQ106

No=1, Yes, as first cousins=3 Yes, as distant cousins=5  
Yes, as uncle and niece=2 Yes, as second cousins=4 Don't know=8

Is there any other member of the family with a similar condition? \_\_\_\_\_ CHQ107

Codes: No=1 Yes=2 (Specify who \_\_\_\_\_) Don't know=8

**NUTRITIONAL HISTORY:**

Was the child breast-fed and for how long? \_\_\_\_\_ CHQ108

Codes: No, never=1 Yes, 1-6 mo=3 Yes, 13-18 m=5 Yes, >24 mo=7  
Yes, <1 mo=2 Yes, 7-12 mo=4 Yes, 19-24 mo=6 Unknown =8

When did the child first start other milks other than breast milk? \_\_\_\_\_ CHQ109

Codes: Never=1 1-6 mo=3 13-18 mo=5 After 24 mo=7  
<1 mo=2 7-12 mo=4 19-24 mo=6 Unknown=8

At what age in months was solid food introduced? \_\_\_\_\_ CHQ110

(Enter 77 if not yet, 88 if unknown)

What are the three main types of foods that child is fed on?(998=Unknown) \_\_\_\_\_ CHQ111

Codes: Legumes (Beans, G/Nuts/Peas) =1 Posho/Millet or Cassava bread=4 Milk =7  
Fish=2 Matooke/Potatoes/Cassava=5 Porridge =8  
Meat =3 Rice= 6 Green vegetables=9

How often is child fed with above food within a 24 hour period? \_\_\_\_\_ CHQ112

Codes: Once=1 Twice=2 Thrice=3 Four times=4 More than 4X/day=5 Unknown=8

What is the consistency of the feeds? \_\_\_\_\_ CHQ113

Codes: Liquids=1 Semi-solids=2 Solids=3 Both Solids and Liquids=4



*Cerebral Palsy Study (CPSTUD) ID: I\G\D\0\9\\_\_\_\\_\_\_\\_\_\_\\_\_\_\\_\_\_\*

Does the child appear to be **lost in his/ her own world**? (Alinga ali aloota “Dreamworld” - use local terms) \_\_\_\_\_ CHQ131

Does the child **respond to his/ her name**? \_\_\_\_\_ CHQ132

Does the child **engage in pretend play**? (like Mummy& Daddy, Doctor, Teacher, Shopkeeper) \_\_\_\_\_ CHQ133

Does the child **make gestures**? (like Come or Bye-Bye) \_\_\_\_\_ CHQ134

Does the child **often bring objects over to you** (caregiver/parent) to show you something? \_\_\_\_\_ CHQ135

Does the child **insist upon a particular routine**? (local examples: insistence on same food habits, wearing same dress/shirt, same cup/plate) \_\_\_\_\_ CHQ136

Does the child have **difficulty in making and maintaining eye contact**? \_\_\_\_\_ CHQ137

**Observation of Function:** Complete for all children.

Instructions: Observe the child carry out **7 tasks** listed below:

1. Observe the child walking at least 5 steps into room. Watch carefully, looking for limp, asymmetry of gait, toe walking, ataxia, involuntary movement, and atrophy or contracture.
2. Welcome the child and observe the response: Does he or she hear, make an appropriate social response, smile, act shy, or speak?
3. Invite the child to squat and pick up a tiny object, such as a bead, coin or raisin (defined size) using each hand in turn. Observe carefully for fisting, asymmetry in grasp, absence of pincer grasp or difficulty in seeing the object.
4. Observe the child as he/she stands up: Does he/she need to use hands to get to an upright position? (proximal muscle weakness)
5. Elicit speech by asking the child questions such as: “What did you pick up?” “What is that?” (point to a raisin, chair etc.) “What is this called?” (point to nose, ear, tooth etc.) “What is your name?” Watch for problems in hearing, speech and comprehension.
6. Ask the child to point to body parts (eyes, mouth etc.) Observe for problems in hearing and comprehension.
7. Give the child paper and a pencil and ask him or her to draw something. Scribble (for 2 year old) or draw shapes: circle (for 3 year old), square (for 4 through 6 years’ old), diamond (for 7 through 9 years’ old). Observe the motor function and comprehension.

**Rate the child in the following areas after observing the above 7 tasks:**

Codes: Pass=1 Fail=2 Uncertain=3

Gross motor \_\_\_\_\_ CHQ138

Hearing \_\_\_\_\_ CHQ139

Vision \_\_\_\_\_ CHQ140

Speech (motor) \_\_\_\_\_ CHQ141

Speech (language) \_\_\_\_\_ CHQ142

Comprehension \_\_\_\_\_ CHQ143

Fine motor \_\_\_\_\_ CHQ144

**Physician/Nurse/Research Assistant:** Codes: No=1 Yes=2 Uncertain=8.

Do you think, based on the interview with the informant and this brief observation that the child has autistic features? \_\_\_\_\_ CHQ145

Do you think, based on the interview with the informant that child has epilepsy? \_\_\_\_\_ CHQ146

Sign if you have checked that the form is complete \_\_\_\_\_
